# Supplementary material for: High performance Li–S battery based on amorphous NiS2as the host material for the S cathode
Source: Royal Society of Chemistry journal article supplement (doi:10.1039/c6ta05635k), 2016-01-01
Supplement: c6ta05635k1.pdf [file c6ta05635k1.pdf]

# **Supporting Information for High Performance Li-S Battery Based on Amorphous NiS<sub>2</sub> as the Host Material for the S Cathode**

By Zhen Liu etc.

## *S1 Detail of Experiment:*

### *Synthesis of S@a-NiS<sub>2</sub>, a-NiS<sub>2</sub> and c-NiS<sub>2</sub>*

The S@a-NiS<sub>2</sub> composite was obtained through a simple solution process at room temperature. Na<sub>2</sub>S<sub>8</sub> was synthesized through the reported method under the protection of Argon, 1 g Na<sub>2</sub>S and 20 g S was mixed, to make sure that the S was excessive. The mixture was further transferred into 200 mL ethanol and heated at 50 °C for 24 hours. Then the obtained Na<sub>2</sub>S<sub>8</sub> ethanol solution was dripped into 50 mL 0.1M NiCl<sub>2</sub> ethanol solution at room temperature and the obtained black precipitate was separated and repeated washed by ethanol.

The a-NiS<sub>2</sub> was obtained by repeated wash the S@a-NiS<sub>2</sub> composite with CS<sub>2</sub>, and heated at 60 °C for 24 hours.

The c-NiS<sub>2</sub> was obtained through the same process of a-NiS<sub>2</sub> but the reaction temperature of the formation of NiS<sub>2</sub> was 60 °C.

### *Preparation of the S cathode*

The S cathode was prepared by mixing the S@a-NiS<sub>2</sub> composite with carbon black and poly(vinylidene fluoride) (PVDF) at a weight ratio of 8:1:1 and loading the prepared mixture on a piece of aluminum foil, areal S mass loading was ~1 mg/cm<sup>2</sup>.

### *Assemble of Li-S coin cells.*

2032-type coin cells were fabricated in an Ar-filled glove box (MIKROUNA, China) using a Li foil as the counter electrode, a cellgard 2340 micro-porous membrane as the separator, and lithium bis(trifluoromethanesulfonyl)imide (0.8 M) and LiNO<sub>3</sub> (0.2 M) in 1,2-dimethoxyethane and 1,3-dioxolane (1:1 vol%) as the electrolyte.

### *Characterization and measurements*

The S@a-NiS<sub>2</sub>, a-NiS<sub>2</sub> and c-NiS<sub>2</sub> was characterized by X-ray diffraction (XRD) (D/MAX 2500/PC), XPS (250 Xi) and thermogravimetric analysis (TGA) (TG 209 F3). The morphology of the samples was characterized by TEM (FEI F20) and SEM (SUPRA 55). The coin cells were cycled from 1.8 to 3.0 V versus Li<sup>+</sup>/Li with a multichannel battery tester (NEWARE BTS-5V20 mA). Specific charge–discharge capacities were calculated based on the mass of S.

*S2 The Ni 2p core-level XPS spectrum.*

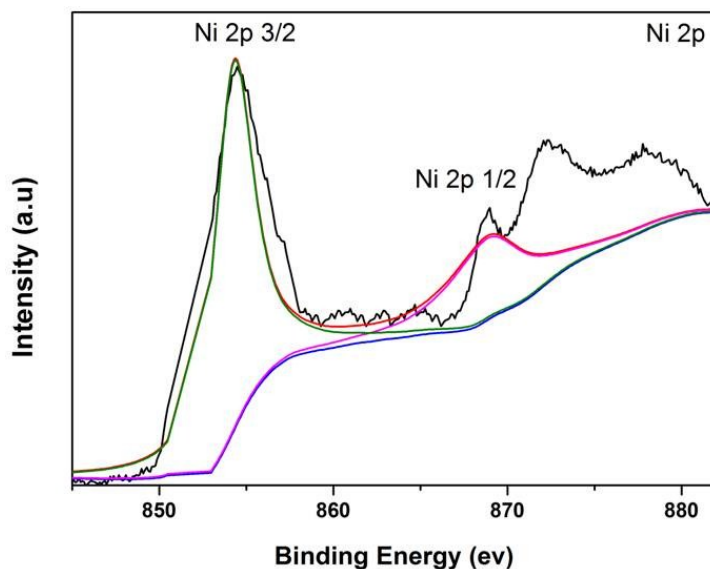

Figure S1 The Ni 2p core-level XPS spectrum.

*S3 EDS of the amorphous NiS<sub>2</sub> in the HRTEM image.*

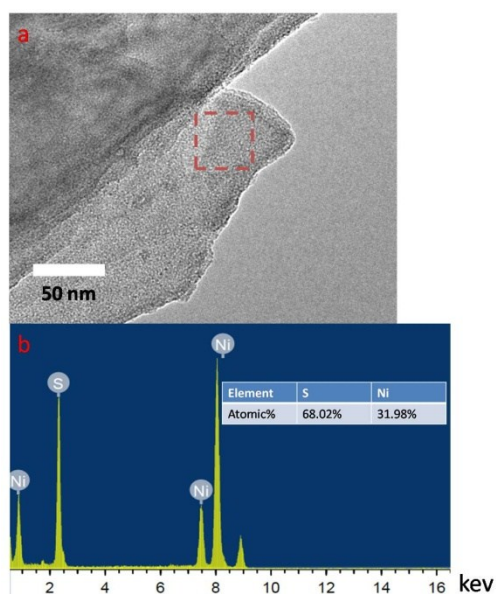

Figure S2 HRTEM of amorphous NiS<sub>2</sub> (a) and EDS of the marked position in figure S3a (b).

S4 SEM of the S@NiS<sub>2</sub> composite, amorphous NiS<sub>2</sub> and crystal NiS<sub>2</sub>.

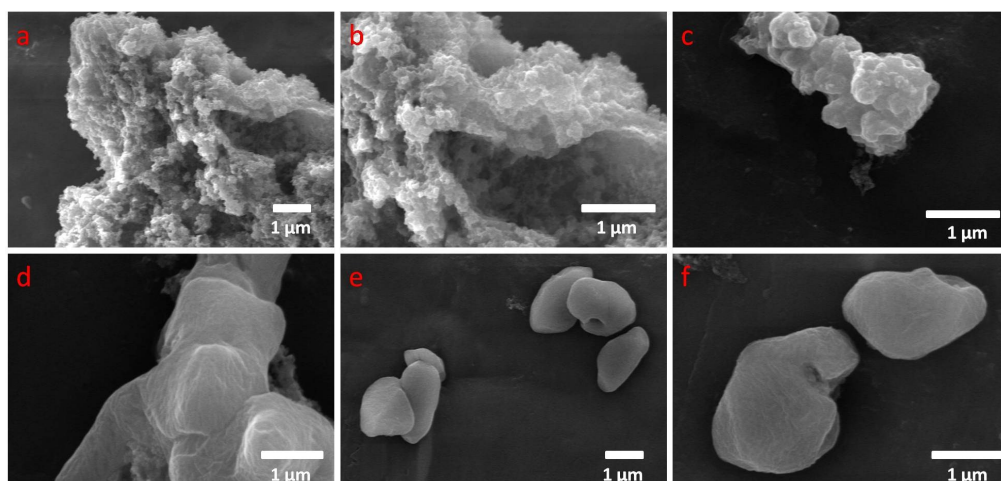

Figure S3 SEM of the S@NiS<sub>2</sub> composite (a, b), amorphous NiS<sub>2</sub> (c, d) and crystal NiS<sub>2</sub> (e, f).

S5 TGA curve of the S@a-NiS<sub>2</sub> composite measured in a nitrogen environment.

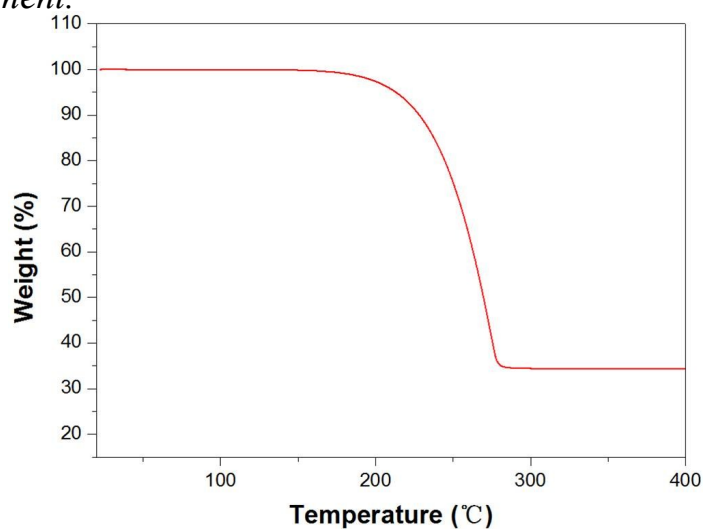

Figure S4 TGA curve of the S@a-NiS<sub>2</sub> composite measured in a nitrogen environment.

S6 Charge and discharge curve of Battery with only a-NiS<sub>2</sub> as the cathode material.

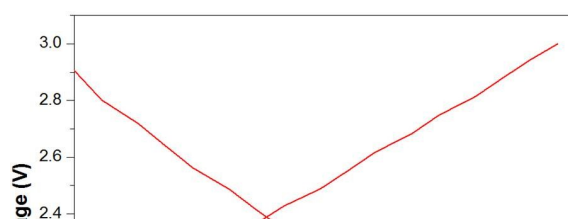

Figure S5 Charge and discharge curve of Battery with only  $\alpha$ -NiS<sub>2</sub> as the cathode material. The electrolyte was lithium bis(trifluoromethanesulfonyl)imide (0.8 M) and LiNO<sub>3</sub> (0.2 M) in 1,2-dimethoxyethane and 1,3-dioxolane (1:1 vol%).

*S7 Charge and discharge curve of Battery with only  $\alpha$ -NiS<sub>2</sub> as the cathode material.*

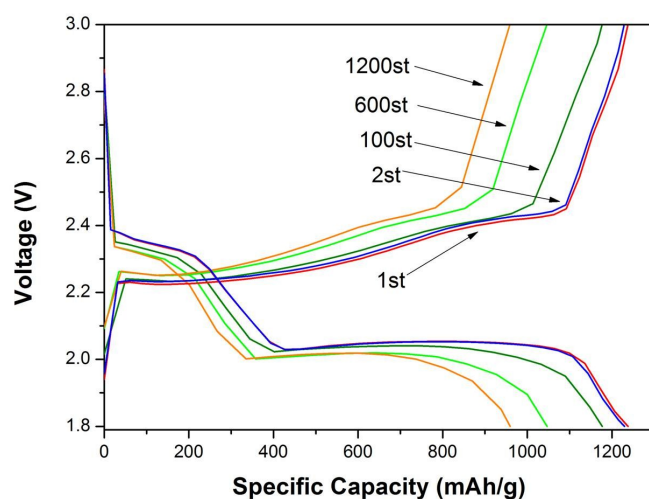

Figure S6 The voltage profiles during the 1200 cycles (Fig. 5a), containing 1st, 2nd, 100th, 600th, and 1200th.

S8 XRD spectrum of crystal  $\text{NiS}_2$  obtained at 60 °C.

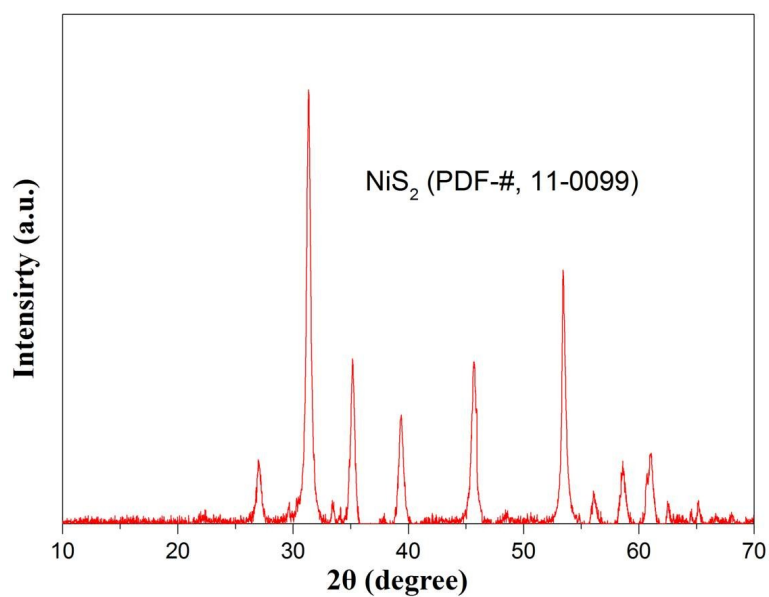

Figure S7 XRD spectrum of crystal  $\text{NiS}_2$

S9 Electrochemical impedance of a- $\text{NiS}_2$  battery and active carbon battery.

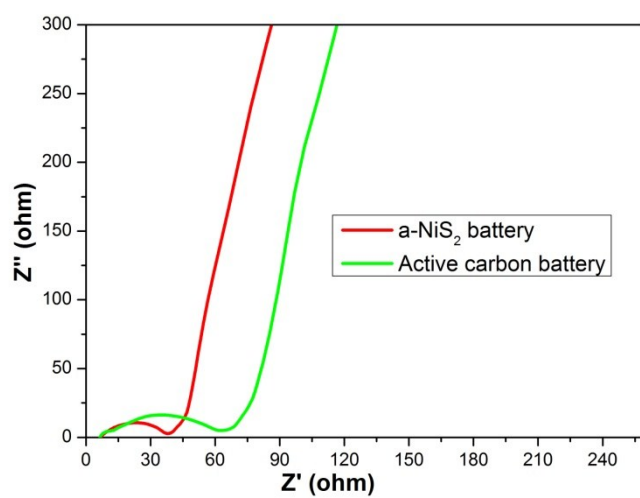

Figure S8 Electrochemical impedance of a- $\text{NiS}_2$  battery and active carbon battery.
